# Supplementary material for: Remote sensing of lower-middle thermosphere temperatures using the N 2 Lyman-Birge-Hopfield (LBH) bands
Source: Copernicus journal article supplement (doi:10.5194/amt-2024-52), 2024-04-08
Supplement: Supplementary file [file amt-2024-52-RC1-supplement.pdf]

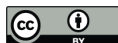

# Remote sensing of lower-middle thermosphere temperatures using the N<sub>2</sub> Lyman-Birge-Hopfield (LBH) bands

Richard Eastes<sup>1</sup>, J. Scott Evans<sup>2</sup>, Quan Gan<sup>1</sup>, Bill McClintock<sup>1</sup>, and Jerry Lumpe<sup>3</sup>

<sup>1</sup>Laboratory for Atmospheric and Space Physics, University of Colorado, Boulder, 80503 CO,

5 <sup>2</sup>Computational Physics, Inc., Springfield, VA, 22151 USA

<sup>3</sup>Computational Physics, Inc., Boulder, CO, 80503 USA

*Correspondence to:* Richard Eastes (richard.eastes@colorado.edu)

**Abstract.** The scientific and societal importance of short-term changes in the thermosphere-ionosphere (T-I) system has highlighted the need to advance our understanding of short-term changes in the lower-middle thermosphere. This need has become increasingly important with the rapid increase in the number of low-earth-orbiting satellites. Geomagnetic activity can dramatically increase thermospheric temperatures and, almost equivalently, thermospheric densities and satellite drag. However, specification of drag during quiet periods may also be problematic when the number of satellites is large. While temperatures and densities at higher altitudes (>~250 km) have been extensively studied and modeled, there is a knowledge gap for densities at lower-middle thermosphere altitudes (< ~200 km). At these lower altitudes the primary sources of thermospheric density data, *in situ* and drag data from satellites, are rarely available. Remote sensing of temperatures and composition by NASA's Global-scale Observations of the Limb and Disk (GOLD) mission can help fill this gap. The GOLD mission produces disk images of neutral temperature, which is key parameter for understanding neutral density in the lower-middle thermosphere. However, since disk images of the temperature have become available only since the launch of GOLD, some researchers may be unfamiliar with the current observational capability that is relevant to the data interpretation. Also, other temperature retrieval techniques than GOLD's have been published. Comparisons indicate that GOLD's technique gives the most consistent results and yields the lowest uncertainties. This paper discusses both temperature retrieval techniques and issues in interpreting GOLD's images of temperatures.

## 1 Introduction

The lower-middle thermosphere plays a key role in the temporal and spatial variability of the thermosphere-ionosphere (T-I) system. Below ~200 km the temperature and composition (e.g. O/N<sub>2</sub> ratio) change rapidly with altitude; both are influenced by forcing from below and above. Waves from below ~100 km deposit energy and momentum in the lower T-I region, as do geomagnetic and solar activity from above. The response of the lower-middle thermosphere to these forcings is believed to be a significant source of the unexplained variability observed throughout entire the T-I system. While the mean state of the T-I system has been extensively studied, the spatial-temporal variability within it is inadequately understood. A lack of observations sufficient to constrain the state variables, especially temperature, in the lower-middle thermosphere has



limited advances in modeling and forecasting. Coincident with the disk images of neutral temperature (Tdisk), GOLD makes images of a second important variable in the T-I, the O/N<sub>2</sub> composition ratio. Images of the composition ratio have previously been used to make tremendous progress in understanding the T-I (e.g., Christensen et al., 2003 citations) and having an additional key variable, temperature, at the same locations and times multiplies the potential for progress in understanding the T-I. Temperature is one of the most fundamental state variables of the T-I system. It is a key to understanding the system's energetics and advancing modeling capabilities.

A clear understanding of the observational limitations of GOLD disk temperature images is essential for researchers using the data. Since Cantrall and Matsuo (2021) provided some informative analyses of an early version (V03) of the GOLD Tdisk data, there have been significant advances in the algorithms the GOLD team uses to retrieve temperatures. As shown in this paper, the changes with solar zenith angle (SZA) in the GOLD Tdisk (V05) and the analysis of Cantrall and Matsuo (2021) are consistent, but there is a key difference between them. Additionally, we provide an overview of the remote sensing technique used by GOLD and summarize some additional information that is relevant to current and potential users of the GOLD disk temperatures.

## 2 Neutral temperature measurements in the lower-middle thermosphere

Remote sensing is essential for observing the lower-middle thermosphere for extended periods of time. While *in situ* observations are possible for brief periods, satellites orbiting at altitudes below ~300 km encounter significant atmospheric drag. Consequently, their orbits decay rapidly, leading to reentry into the Earth's atmosphere unless they have propulsion or are in highly eccentric orbits. In contrast, far ultraviolet (FUV, < 180 nm) emissions resulting from absorption of solar extreme ultraviolet (EUV) radiation by the Earth's atmosphere have been used by numerous satellite missions for remote sensing of Earth's daytime thermosphere at altitudes near 150-160 km [e.g., Dynamics Explorer 1/ Spin Scan Auroral Imager (DE 1/SAI); Thermosphere, Ionosphere, Mesosphere Energetics and Dynamics/ Global Ultraviolet Imager (TIMED/GUVI); Ionospheric Connection Explorer/ Far Ultra-Violet instrument (ICON/FUV), and GOLD]. NASA's GOLD mission, which provides daily spatial-temporal disk images of temperature at 150-160 km, is the first satellite mission to routinely quantify synoptic, neutral temperatures at those altitudes using FUV remote sensing. These disk images are retrieved from the widths of N<sub>2</sub> Lyman-Birge-Hopfield (LBH) band emissions observed.

### 2.1 N<sub>2</sub> Lyman-Birge-Hopfield band observations and modeling

Earth's FUV emissions (~120-180 nm) have been used extensively for remote sensing of the T-I system. A key advantage of using FUV emissions is that they are absorbed by O<sub>2</sub> in Earth's atmosphere which blocks contributions from below ~100 km. Consequently, any FUV emissions observed must come from higher altitudes, and since these emissions can't reach Earth's surface, observations are only possible from space.



The  $N_2$  LBH bands are one of Earth's most important FUV emissions for remote sensing of the thermosphere (e.g., Christensen et al., 2003). Photoelectrons - produced when the Sun's short wavelength photons (<45nm) are absorbed in Earth's atmosphere - collide with ~~molecular nitrogen~~ ( $N_2$ ), producing the LBH band emissions. These typically peak near 150-160 km when the SZA is small with the peak trending higher as the SZA increases. Examples of this behavior are shown in recent publications by Aryal et al. (2022, Fig. 2) and Evans et al. (2024, Fig. 4). Although there are longer wavelength emissions, most satellite missions have focused on wavelengths below 180 nm where the brightest emissions occur. An example of the  $N_2$  LBH spectrum within GOLD's bandpass was shown in Fig. 4 of McClintock et al. (2020).

The LBH bands are emitted when  $N_2$  makes transitions from the vibrational levels of the  $a \ ^1\Pi_g(a)$  state to the  $X \ ^1\Sigma_g^+$  ( $X$ ) ground state. The full-width-half-maximum ( $\sim 0.35$  nm) of individual bands, attributable to the molecules' rotational energy levels, varies with the temperature of the  $N_2$  molecules. As discussed in Aksnes et al. (2006) the band width is expected to reflect the ground ( $X$ ) state temperature. Consequently, the band widths observed are representative of thermospheric temperature, which can be retrieved from the emissions when observed with spectral resolution sufficient to distinguish changes in the band widths (i.e., a full-width-half-maximum of  $\sim 0.35$  nm).

## 75 2.2 Thermospheric temperatures from the $N_2$ LBH band widths

The GOLD mission measures changes in the  $N_2$  LBH band widths to produce disk images of thermospheric temperature. It also retrieves exospheric temperatures from limb brightness profiles of the  $N_2$  LBH emission. That technique has been used on numerous missions and is described in detail elsewhere (e.g., Meier and Anderson, 1983; Evans et al., 2020). The focus here is on atmospheric temperature retrievals from the  $N_2$  LBH band widths.

80 Since each band of LBH emission is similarly dependent on  $N_2$  temperature, retrievals can, in principle, use either a single or multiple bands. GOLD uses all the bands between 137.0 nm and 148.5 nm to increase signal-to-noise and precision of Tdisk, but this also increases the number of parameters that must be determined, either during the retrieval or in advance. To minimize the uncertainties this is done in advance when possible. For example, GOLD retrievals use emissions from multiple vibrational levels and that requires knowledge of their relative populations (i.e. the fraction of the molecules in each

85 vibrational level) which are taken from Aryal et al. (2022) (Evans et al., 2024). Although Eastes and Dentamaro (1996) and Eastes (2000) have shown that some of the LBH excitation is by cascade into the ( $a$ ) state from other higher lying states in addition to electron impact directly to the ( $a$ ) state from the ground ( $X$ ) state, observations (Aryal et al., 2022) indicate that the vibrational populations observed in the dayglow are essentially constant, the only appreciable cascade contributions are via radiative cascade (that cascade due to collisions, which changes with the number densities, is insignificant).

90 GOLD temperature retrievals are also sensitive to errors in the wavelength scale. These are not known in advance and can be significant. Their significance can be seen from Fig. 1 which shows displacements of the O I 135.6 nm line during the first two years of the mission and knowing that 1 pixel is  $\sim 0.4 \text{ \AA}/0.04 \text{ nm}$ . The changes shown in Fig. 1 are attributed to seasonal



changes in solar illumination altering the temperature gradient within the instrument. The resulting shifts in wavelength scale are tracked using the locations of the O I 135.6 nm and NI 149.3 nm emission lines throughout each day to calculate scales for individual rows in each image. From these an average wavelength scale for each GOLD image is calculated and recorded in the GOLD LIC data products. However, row-by-row deviations by  $\sim 1/2$  pixel ( $0.2 \text{ \AA}$  /  $0.02 \text{ nm}$ ) from this average are present in the LIC data. While averaging across multiple bands decreases the influence of small-scale, wavelength errors on GOLD's Tdisk values, overall shifts in wavelength are fit during the retrieval (Evans et al., 2024) to further reduce the effects of these errors.

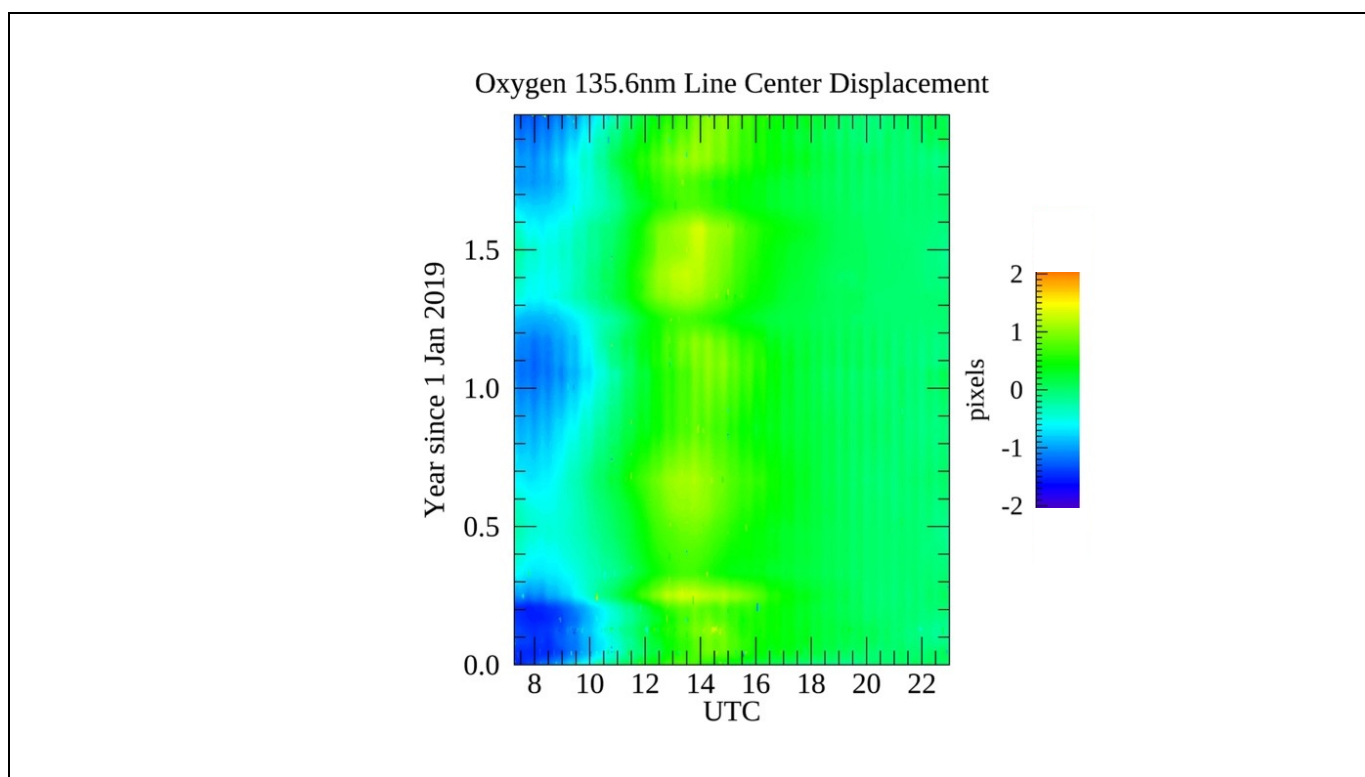

**Figure 1: Changes in the peak pixel for the OI 135.6 nm line observed by GOLD throughout each day during 2019 and 2020. The wavelength scales included in the LIC data for each scan decrease the deviations to  $\sim 0.2 \text{ \AA}$  ( $\sim 1/2$  pixel).**

100 An example of GOLD's Tdisk values and uncertainties since the beginning of the mission are shown in Fig. 2. The temperatures shown in 2a are the mean of the V05 Tdisk data (released 5/26/2023) in a  $10^\circ \times 10^\circ$  (1000 km x 1000 km) sample at the subsatellite longitude and  $10^\circ$  latitude for three local times (7, 12 and 15 hours). The V05 mean absolute and relative random uncertainties (errors) for these data samples are shown in Figs 2(b) and 2(c) respectively. While observed temperatures vary with local solar time, the relative changes throughout the mission are similar at all LTs. As discussed  
105 earlier, uncertainties in the retrieved temperatures vary with SNR in the dayglow observations which varies with local time since the dayglow brightness has a strong dependence on solar zenith angle changes with local time. The mission began observations during solar minimum, in late 2018. Now, five years later, the Sun is near solar maximum and its irradiance has



increased, increasing the brightness of the LBH bands and the SNR of the data. The result is a long term decrease in the uncertainties and increase in the temperatures. An annual variation superimposed on the transition from solar minimum to maximum, most clearly seen in the uncertainties, is primarily due to the annual SZA variation at the sampled area, 10° north of the equator. The largest uncertainties are during the northern hemisphere winter, when the mean SZA is larger resulting in smaller SNR. Further reductions in the uncertainties can be achieved by combining pixels when smaller uncertainties are needed.

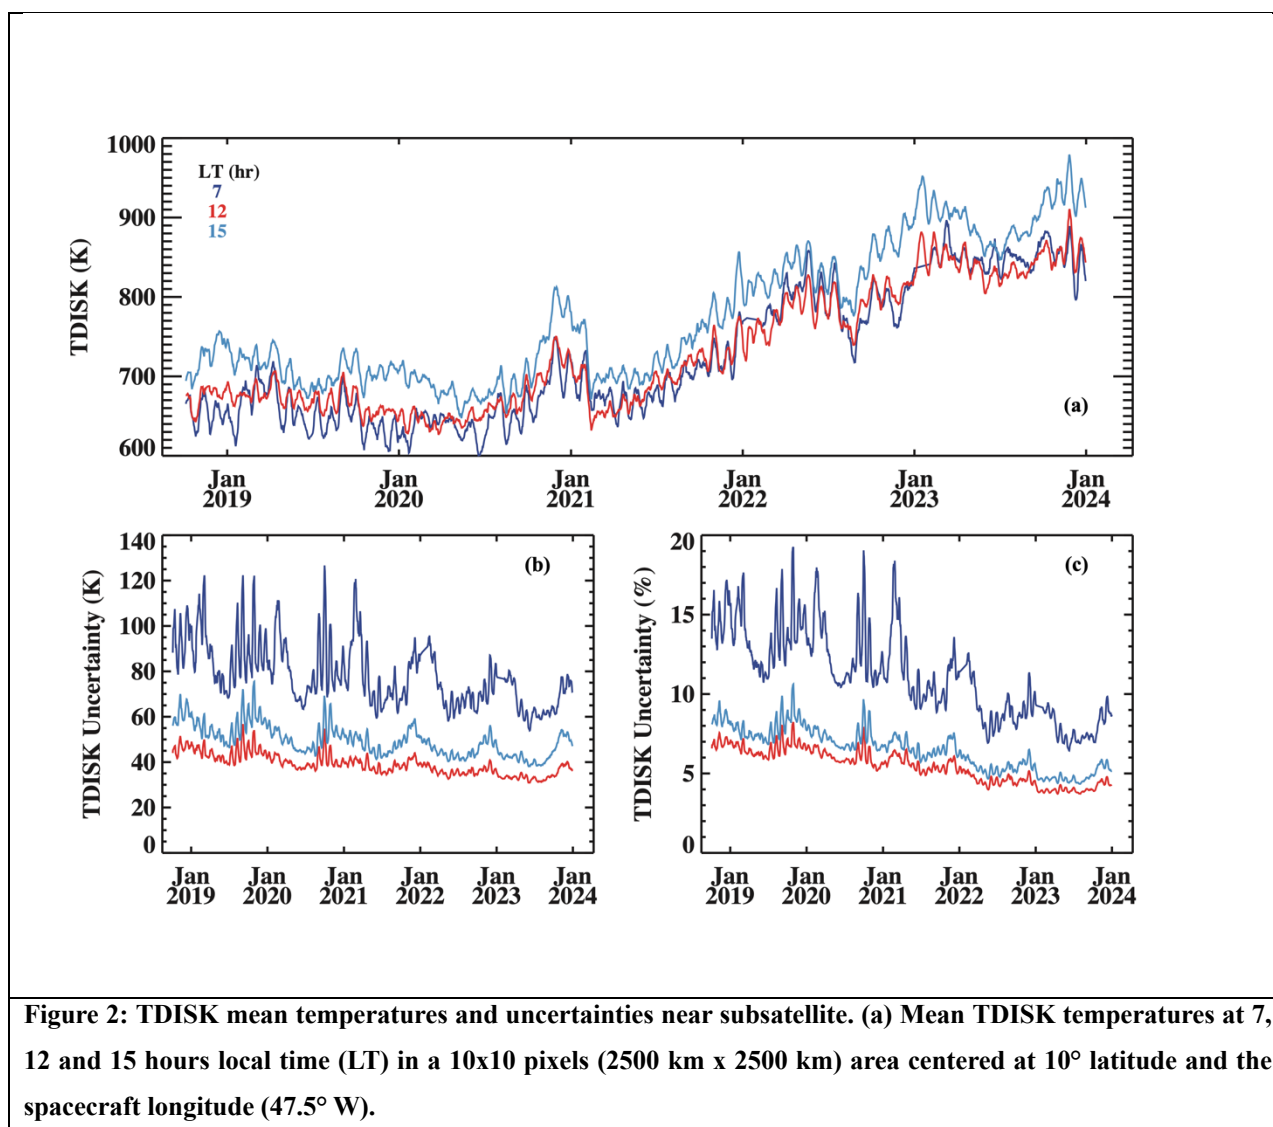

Figure 2: TDISK mean temperatures and uncertainties near subsatellite. (a) Mean TDISK temperatures at 7, 12 and 15 hours local time (LT) in a 10x10 pixels (2500 km x 2500 km) area centered at 10° latitude and the spacecraft longitude (47.5° W).



### 2.3 Other temperature retrieval approaches

Temperature retrieval using a single LBH band has also been studied by Cantrall and Matsuo (2021). They used the LBH (2,0) band, the brightest band resolved by GOLD [the (3,0) band overlaps the OI 135.6 nm emission], but the SNR is lower than for GOLD's retrievals. They noted that their single-band technique is sensitive to wavelength errors and performed additional, row by row (corresponding to latitude on the detector) fitting of the LIC wavelength scale to mitigate this. Their analyses indicated that a 0.5 pixel (0.2 Å) uncertainty in their wavelength registration corresponded to an uncertainty of ~100K in the retrieved temperature. This dependence on the wavelength registration is a possible source of differences from GOLD's results discussed in the next section. The approach used by Cantrall and Matsuo (2021) assumed that the LBH (2,0) band emissions at wavelengths > 138.56 nm (< 138.56 nm) were positively (negatively) correlated with temperature. However, Evans et al. (2024) found that the separation between positively and negatively correlated portions of the band changes slightly with thermospheric temperatures. Further testing and possibly development of temperature retrievals from a single band would be needed before relying on the technique.

A third approach, proposed by Zhang et al. (2019), uses the ratio of the (0,0) and (1,0) bands to deduce temperature. The relative brightness of the bands would be insensitive to the wavelength shifts in GOLD LIC data. However, the reliability of the technique is uncertain because the ratio is also affected by the radiative cascade contributions, as discussed by Eastes and Dentamaro (1996). Recent laboratory work by Ajello et al. (2020) has confirmed that there is excitation by cascade into the (*a*) state from other excited states, in addition to direct excitation from the ground (*X*) state. This excitation by cascade alters the brightness ratio of the  $v' = 0, 1$  and 2 emissions from the (*a*) state, causing deviations from the *X-a* Franck-Condon (F-C) factors, as assumed in the band ratio technique. Much more development would be needed before the band ratios could be a viable possibility. Although there are small changes in the amount of emission on the long wavelength side of the peak, which both the GOLD mission and Cantrall and Matsuo (2021) rely upon to determine the temperature, the total amount of emission is independent of rotational temperature. Consequently, the SNR for retrievals from GOLD data would be significantly less (factor of > 5 based on F-C factors) than is used in GOLD's approach, and uncertainties in the derived information would be significantly larger than from GOLD's approach.

### 2.4 GOLD mission observations of disk temperatures

GOLD's observations provide temperatures ( $T_{\text{disk}}$ ) near 160 km over much of the hemisphere centered on 47.5° W. Early versions (V1 – V3) of the  $T_{\text{disk}}$  data contained a bias, to lower temperatures, for  $\text{SNR} \leq 20$ . Additional spatial (from 125x125 km to 250x250 km) and spectral (from 0.04 nm to 0.08 nm) binning was implemented in V04 (released 8/5/2022) and later  $T_{\text{disk}}$  data, increasing the SNR and eliminating the cold bias for essentially all observations, including those near solar minimum. The bias is evident in V03 when compared to V05, as seen in Fig.s 3a and 3b for observations





acquired on 2-8 November 2018, which was during solar minimum. The V05 temperatures (3a) are higher than V03 (3b) by as much as ~90 K.

150 The 2-8 November 2018 data were also discussed by Cantrall and Matsuo (2021), and the angular dependence shown in Fig. 3(a) matches their retrievals ( $T_{ci}^G$ , the left panel in their Fig. 9). However, the Cantrall and Matsuo (2021) temperatures for these data are ~40K lower at all angles. This suggests a systematic bias because it is much larger than expected given the random uncertainties in the GOLD V05 data and that an average of seven days of data are used. According to Cantrall and Matsuo (2021) a wavelength scale error of 0.1 Å introduces a 50K error when using their  
155 technique. This is in addition to the uncertainties associated with the SNR of the LBH (2,0) band. Maintaining the precision of the wavelength scale to 0.01 Å would limit uncertainty contributions from the wavelength scale to 5K, which would be a factor of ~1.2 increase in the lowest uncertainties show in Fig. 2a. Achieving a precision of ~0.01 Å for GOLD observations over extended time periods may require one to also track the shape of the 135.6 nm emission because it changes as the detector's response degrades, as discussed by McClintock et al. (2020). As discussed by Evans et al. (2024) GOLD's  
160 retrievals include wavelength scale shifts concurrently with the temperatures during retrievals. Uncertainties in the wavelength scale are included in the uncertainties shown in Fig. 2. This difference highlights an advantage of GOLD's approach.

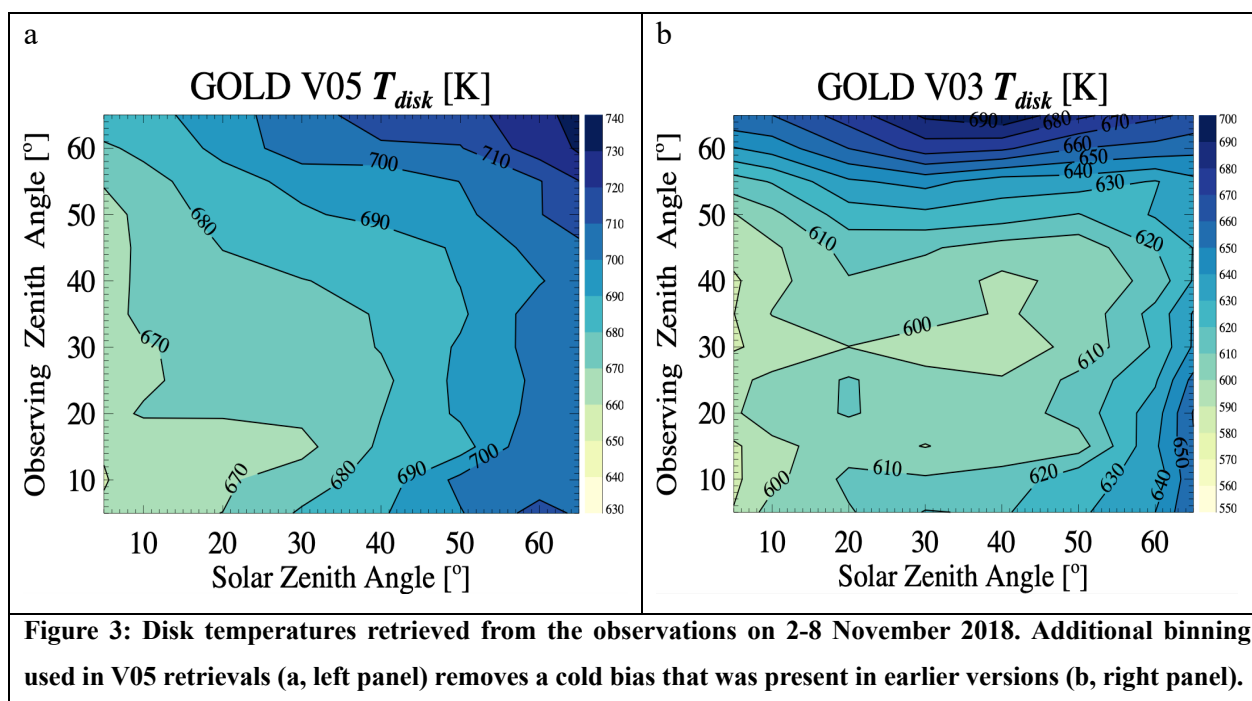

165 Eliminating the cold bias in  $T_{disk}$  also decreases the gradients seen in temperature. Since the cold bias is SNR dependent, earlier versions of the data (e.g., V03) from near solar minimum had gradients due to both the cold bias at low



170

SNR and the change in SZA. The SZA dependence, as explained by Evans et al (2024) and summarized briefly in Section 2.1 is geometrically inherent to all remote sensing of disk temperatures. A higher-level data product (Level 3) that is corrected for the SZA dependence is possible and hopefully can be produced for a future data release.

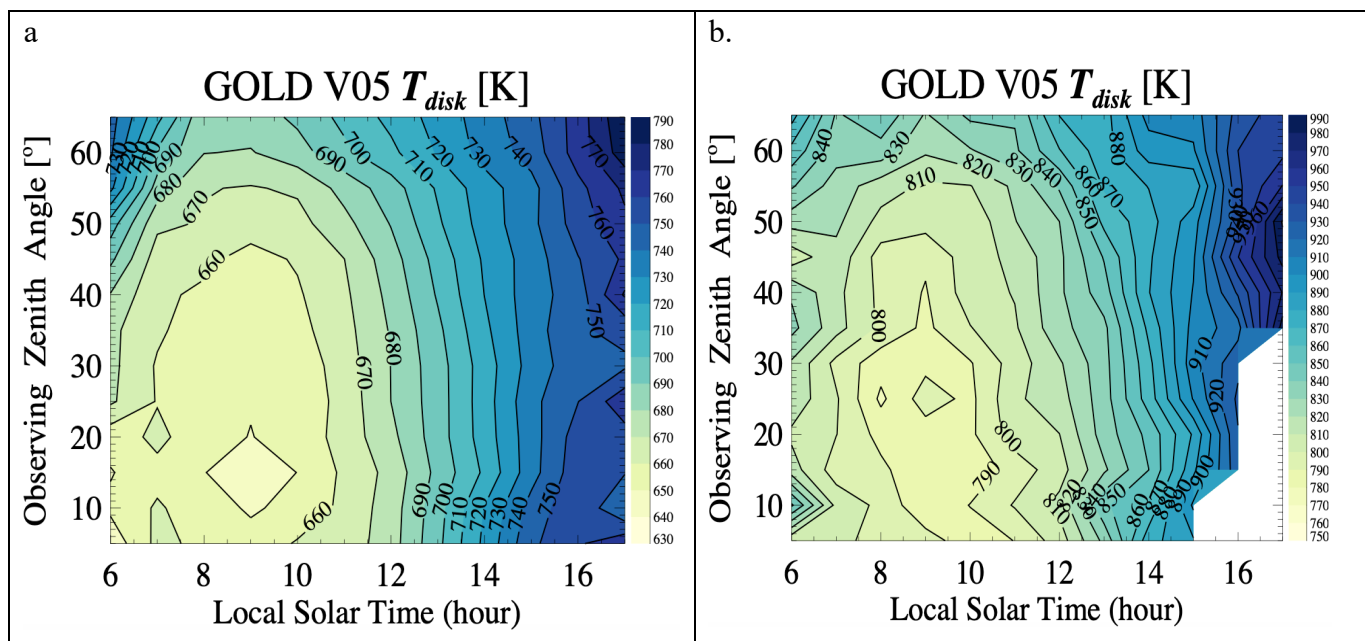

**Figure 4: Disk temperatures retrieved from the observations as function of observing zenith angle versus Local solar time (LST) on (a) 2-8 November 2018 (same data as Fig. 3a and including some geomagnetically active days) near solar minimum and on (b) 4-5 November 2022, two geomagnetically quiet days near solar maximum.**

Given that SZA and Local Solar Time (LST) at a location are directly related, the structure seen in Fig. 4 when plotting temperature by LST rather than SZA is similar to that in Fig. 3. That there is less change with LST (or equivalently SZA) before noon than after noon is attributed to a combination of two factors. First, the peak of the observed LBH emission is lowest at local noon and increases with LST difference from noon. Second, thermospheric temperatures at all altitudes increase until after noon as the exospheric temperature increases (e.g., Evans et al., 2020). Consequently, as the atmospheric temperatures increase following sunrise the most relevant altitudes shift downward rapidly enough that the combined effect is lower temperatures until noon. After noon the thermospheric temperature and the peak altitude of the observed emissions both increase initially, and the effect of changing the peak altitude is sufficient for the observed temperatures to increase until the observations end. The missing data in the lower right of Fig. 4b is attributed to a change in the observing schedule. In 2022 nighttime observations by channel A, which was used for the T<sub>disk</sub> observations, began earlier than in 2018.

In both Fig. 3a and 4 there is a 20-40 K increase in the temperatures at the largest viewing angles. This increase may be attributable to energy deposition at high latitudes (e.g., Gan et al., 2023). Since GOLD is in a geostationary orbit, all





the high latitude observations are at the larger observing zenith angles and some auroral heating would be expected even during geomagnetically quiet times.

The SZA/LST dependence seen in Figs. 3a and 4 are much smaller than the thermospheric temperature changes seen during storms or, as shown in Fig. 5, throughout the mission. The maximum estimated bias in V05 Tdisk at large observing zenith angles is 10-20K [see Fig. S5 of Evans et al. (2023)]. Dayside average disk temperatures exhibit a high correlation with the solar irradiance, represented here by Qeuv from GOLD (Correira et al., 2021). Similar agreement between the long-term trends is also seen with FISM-2 (Chamberlain et al., 2020) and F10.7 (neither shown). A significant correlation with geomagnetic activity (represented by Kp in the Fig.) is also discernible. A ~27-day solar rotation period is seen in both the temperatures and Qeuv. For solar minimum conditions, the correlation between geomagnetic activity and Tdisk was discussed by Laskar et al. (2021) and is also readily identifiable in Fig. 5 near solar maximum.

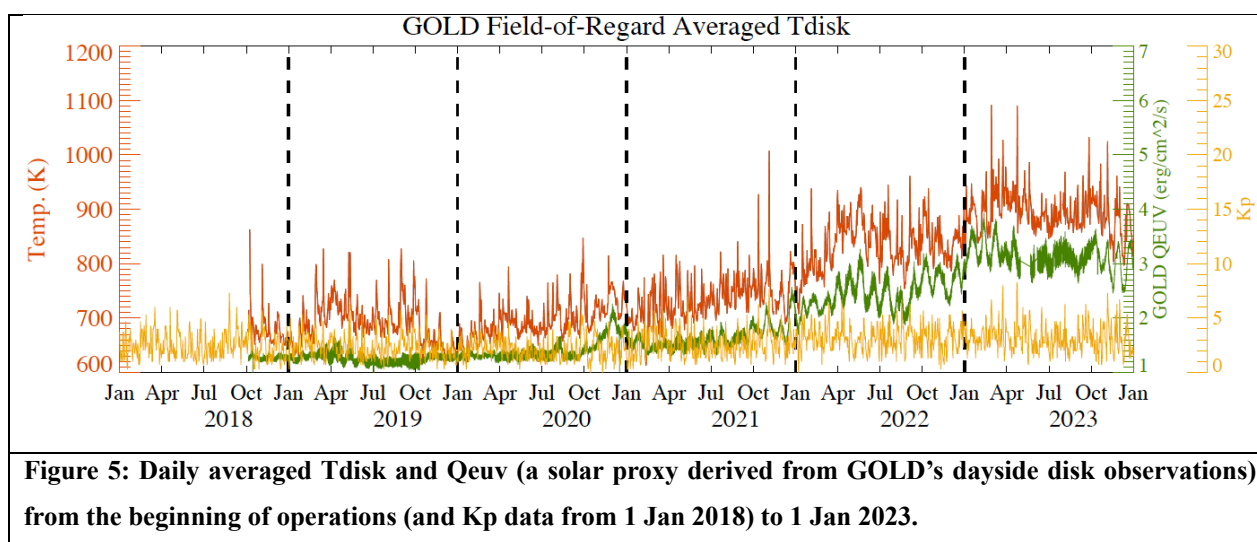

### 195 3 Conclusions

Results and analyses demonstrate the robustness of GOLD's approach to retrieving disk temperatures by simultaneously fitting multiple LBH bands. This method explicitly addresses limitations in the other approaches that have been documented. As a result GOLD provides the most reliable neutral temperatures in Earth's lower-middle thermosphere (150-160 km). GOLD V05 uncertainties depend on the signal-to-noise (SNR) ratio of the data, as for any retrieval, and biases toward low temperatures, which were present in versions prior to V04, are negligible in V05, as seen from examination of the solar zenith angle (SZA) versus observing zenith angle dependence. While the SZA dependence (which is inherent to all remotely sensed disk temperatures and could be addressed in a future data product) slightly complicates the use and interpretation of the data, the effect is typically less than the uncertainties in the temperatures.



205 In the current version, the random uncertainties during solar maximum are sometimes ~30K per pixel (250 km x  
250 km at nadir). Significantly lower uncertainties can be achieved by spatial averaging or smoothing the V05 data to the  
larger spatial scales typical of many thermospheric effects. GOLD uncertainties are sufficiently low to provide  
unprecedented opportunities study the T-I responses to forcing from below as well as forcing from above. The Tdisk data  
provide unprecedented opportunities - especially with the concurrent and co-located O/N<sub>2</sub> data derived from the same  
spectra.

210

#### Author contributions

RE developed the concept for and prepared the manuscript. QG, BM, and JL created figures used in the paper. JSE provided  
details for interpretation of the GOLD Tdisk data. All co-authors and the author contributed to editing paper drafts.

#### 215 Competing interests

The contact author has declared that neither they nor the co-authors have competing interests.

#### Acknowledgements

220 The authors thank C. Cantrall and T. Matsuo for their efforts to elucidate the sensitivity of GOLD Tdisk retrievals to low  
signal-to-noise.

#### Financial support

This study was supported by NASA Contract 80GSFC18C0061 to the University of Colorado, Boulder.

#### 225 References

- Ajello, J. M., Evans, J. S., Veibell, V., Malone, C. P., Holsclaw, G. M., Hoskins, A. C., et al.: The uv spectrum of the lyman-  
birge-hopfield band system of N<sub>2</sub> induced by cascading from electron impact. *Journal of Geophysical Research: Space  
Physics*, 125(3), e2019JA027546. <https://doi.org/10.1029/2019JA027546>, 2020.
- 230 Ajello, J. M., & Shemansky, D. E: A reexamination of important N<sub>2</sub> cross sections by electron impact with application to the  
dayglow: The Lyman-Birge-Hopfield band system and NI (119.99 nm). *Journal of Geophysical Research: Space  
Physics*, 90(A10), 9845-9861, <https://doi.org/10.1029/JA090iA10p09845>, 1985.
- Aksnes, A., Eastes, R., Budzien, S., and Dymond, K.: Neutral temperatures in the lower thermosphere from N<sub>2</sub> Lyman-  
Birge-Hopfield (LBH) band profiles. *Geophysical Research Letters*, 33(15), <https://doi.org/10.1029/2006GL026255>, 2006.
- 235 Aryal, S., Evans, J. S., Ajello, J., Solomon, S., Burns, A., Eastes, R., & McClintock, W.: Constraining the upper level  
vibrational populations of the N<sub>2</sub> lyman-birge-hopfield band system using gold mission's dayglow observations. *Journal of  
Geophysical Research: Space Physics*, 127(9), e2021JA029869. <https://doi.org/10.1029/2021JA029869>, 2022.

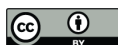

- Cantrall, C., & Matsuo, T.: Deriving column-integrated thermospheric temperature with the N<sub>2</sub> Lyman–Birge–Hopfield (2, 0) band. *Atmospheric Measurement Techniques*, 14(11), 6917–6928. <https://doi.org/10.5194/amt-14-6917-2021>, 2021.
- 240 Chamberlin, P. C., Eparvier, F. G., Knoer, V., Leise, H., Pankratz, A., Snow, M., et al.: The flare irradiance spectral model-version 2 (FISM2). *Space Weather*, 18, e2020SW002588. <https://doi.org/10.1029/2020SW002588>, 2020.
- Christensen, A.B., Paxton, L.J., Avery, S., Craven, J., Crowley, G., Humm, D.C., Kil, H., Meier, R.R., Meng, C.I., Morrison, D. and Ogorzalek, B.S.: Initial observations with the Global Ultraviolet Imager (GUVI) in the NASA TIMED satellite mission. *Journal of Geophysical Research: Space Physics*, 108(A12). <https://doi.org/10.1029/2003JA009918>, 2003.
- 245 Correia, J., Evans, J. S., Lumpe, J. D., Krywonos, A., Daniell, R., Veibell, V., et al., Thermospheric composition and solar EUV flux from the Global-scale Observations of the Limb and Disk (GOLD) mission. *Journal of Geophysical Research: Space Physics*, 126, e2021JA029517. <https://doi.org/10.1029/2021JA029517>, 2021.
- Eastes, R. W., & Dentamaro, A. V.: Collision-induced transitions between the a <sup>1</sup>Π g, a' <sup>1</sup>Σ<sub>u</sub><sup>-</sup>, and w <sup>1</sup>Δ<sub>u</sub> states of N<sub>2</sub>: Can they affect auroral N<sub>2</sub> Lyman-Birge-Hopfield band emissions?. *Journal of Geophysical Research: Space Physics*, 101(A12), 26931-26940. <https://doi.org/10.1029/96JA01636>, 1996.
- 250 Eastes, R. W.: Modeling the N<sub>2</sub> Lyman-Birge-Hopfield bands in the dayglow: Including radiative and collisional cascading between the singlet states. *Journal of Geophysical Research: Space Physics*, 105(A8), 18557-18573. <https://doi.org/10.1029/1999JA000378>, 2000.
- Evans, J. S., Lumpe, J., Correia, J., Viebell, V., Krywonos, A., Solomon, S. C., and Eastes, R. W.: Neutral exospheric temperatures from the Global-scale Observations of the Limb and Disk (GOLD) mission, *J. Geophys. Res. Space Physics*, 125, e2020JA027814, doi:10.1029/2020JA027814, June 2020.
- 255 Evans, J. S., J. D. Lumpe, R. W. Eastes, J. Correia, S. Aryal, F. Laskar, V. Veibell, A. Krywonos, T. Plummer, W. E. McClintock: Neutral disk temperatures from the Global-scale Observations of the Limb and Disk (GOLD) mission, *Journal of Geophysical Research*, doi:10.1029/2024JA032424, 2024.
- 260 Laskar, F. I., Eastes, R. W., Codrescu, M. V., Evans, J. S., Burns, A. G., Wang, W., et al.: Response of GOLD retrieved thermospheric temperatures to geomagnetic activities of varying magnitudes. *Geophysical Research Letters*, 48, e2021GL093905. <https://doi.org/10.1029/2021GL093905>, 5, 2021.
- McClintock, W. E., Eastes, R. W., Hoskins, A. C., Siegmund, O. H. W., McPhate, J. B., Krywonos, A., Solomon, S. C., and Burns, A. G.: Global-scale Observations of the Limb and Disk mission implementation: 1. Instrument design and early flight performance, *J. Geophys. Res.-Space*, 125, e2020JA027797, <https://doi.org/10.1029/2020JA027797>: 2020.
- 265 Meier, R. R., and D. E. Anderson, Jr.: Determination of atmospheric composition and temperature from the UV airglow, *Planet. Space Sci.*, 31, 967, [https://doi.org/10.1016/0032-0633\(83\)90088-0](https://doi.org/10.1016/0032-0633(83)90088-0), 1983.
- NASA: GOLD, available at: <http://gold.cs.ucf.edu/search/> (last access: 5 February 2024), 2024a.
- NASA: NASA's Space Physics Data Facility (SPDF), available at: <https://spdf.gsfc.nasa.gov> (last access: 5 February 2024), 2024b.
- 270 NASA: OMNIWeb Plus, available at: <https://omniweb.gsfc.nasa.gov/> (last access: 5 February 2024), 2024c.

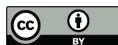

Zhang, Y., Paxton, L. J., and Schaefer, R. K.: Deriving thermospheric temperature from observations by the global ultraviolet imager on the thermosphere ionosphere mesosphere energetics and dynamics satellite, *J. Geophys. Res.-Space*, 124, 5848–5856, <https://doi.org/10.1029/2018JA026379>, 2019.

275 Gan, Q., Eastes, R. W., Wu, Y.-J., Qian, L., Cai, X., Wang, W., England, S. L., McClintock, W.E.: Thermospheric responses to the 3 and 4 November 2021 geomagnetic storm during the main and recovery phases as observed by NASA's GOLD and ICON missions, *Geophysical Research Letters*, 51, e2023GL106529, <https://doi.org/10.1029/2023GL106529>, 2024.
